# Supplementary material for: Novel reactions of phosphorus(iii) azides and isocyanates: unusual modes of cycloaddition with dipolarophiles and an unexpected case of ring expansionElectronic supplementary information (ESI) available: Platon diagrams with selected bond parameters for 4 and 6 and experimental details. See http://www.rsc.org/suppdata/cc/b1/b107087h/
Source: Royal Society of Chemistry journal article supplement (doi:10.1039/b107087h), 2001-12-03
Supplement: b107087h.doc [file b107087h.doc]

**S1**

**Supplementary information**

[Communication Ref.: B107087H (Web Password: 703536)]

Title: Novel reactions of phosphorus(III) azides and isocyanates: unusual modes of cycloaddition with dipolarophiles and an unexpected case of ring expansion

Authors: Sudha Kumaraswamy, Praveen Kommana, N. Satish Kumar

and K. C. Kumara Swamy*

1. Experimental details for the synthesis of**3**-**6 S2-S3**

2. Platon diagram for **4** with selected bond parameters **S4**

3. Platon diagram for **6.**CH3CN with selected bond parameters **S5**

4. Possible mechanism for the formation of **3**-**5** **S6**

**S2**

*Experimental details for the synthesis of* **3**-**6**

**3**.3/4CH3CN: A solution of DMAD (0.58 g, 4.14 mmol) in hexane (5 ml) was added dropwise (20 min) to a solution of **1**5(c) (1.70 g, 4.14 mmol) in hexane (10 ml) with continuous stirring at room temperature under a nitrogen atmosphere. After stirring overnight, the solvent was removed *in vacuo* and acetonitrile (15 ml) was added, resulting in a clear solution. Upon reducing the volume to 5 ml, crystals of **3**.3/4CH3CN (1.78 g, 82%) separated out: mp 170-172C (decomp) [Found: C, 64.32; H, 7.09; N, 8.97. Calc. for C52H66N6O8P2 (after powdering and drying *in vacuo*): C, 64.72; H, 6.80; N, 8.71]. IR (Nujol): = 2168 (PN3), 1203 (P=N) cm-1. 1H NMR (CDCl3):  1.22 (s, 18 H, *t*Bu-*H*), 1.23 (s, 18 H, *t*Bu-*H*), 2.00 (s, variable intensity, C*H*3CN), 2.18 (s, 12 H, Ar-C*H*3), 3.45 (d, partially buried in the signal at  3.5, 1 H, Ar-C*H*AHX), 3.53 (s, 3 H, OC*H*3), 3.63 (s, 3 H, OC*H*3), 4.15-4.45 (br, 2 H, Ar-C*H*2), 4.80 (d, 2*J*(H,H) ~ 16.0 Hz, 1 H, Ar-CHA*H*X), 6.83-6.93 (many lines, 8 H, Ar-*H*). 31P NMR (CDCl3):  46.0 (s), - 3.7 (s).

A reaction done by reverse addition (azide added to DMAD) also gave **3** essentially as a single product (> 85%).

**4**: To a solution of **2** (4.11 g, 10 mmol) [mp 124-126C, (P): 121.2] in toluene (20 ml) was added DMAD (1.42 g, 10 mmol) all at once and the solution stirred for 72 h at room temperature. Concentration (to 3 ml) followed by addition of heptane (4 ml) gave crystals of **4**. (4.70 g, 85%) over a period of 24 h: mp 138-144C (frothing) [Found: C, 64.92; H, 6.66; N, 2.61. Calc. for C30H36NO7P :C, 65.09; H, 6.55; N, 2.53]. IR (KBr): = 1736 cm-1 (br). 1H NMR (CDCl3):  1.20 (s, 18 H, *t*Bu*H*), 2.20 (s, 6 H, ArC*H*3), 3.62 (d, 2*J*(H,H) = 16.1 Hz, 1 H, ArC*H*AHX), 3.72 (s, 3 H, OC*H*3), 3.86 (s, 3 H, OC*H*3), 4.70 (d, 2*J*(H,H) = 16.1 Hz, 1 H, ArCHA*H*X), 6.92 and 6.98 (two s, 4 H, Ar-*H*). 31P NMR (CDCl3):  56.7. Crystals for X-ray structure determination were obtained from CH2Cl2-hexane (1:2) mixture.

**S3**

**5**.C6H5CH3 and **6**.CH3CN: To a solution of **4** (0.553 g, 1.0 mmol) in THF (10 ml) was added 2-(methylamino)ethanol (for **5**, 0.075 g, 1.0 mmol) or 2,2,2-trifluoroethanol (for **6**, 0.100 g, 1.0 mmol) *via* syringe and the reaction mixture stirred for 72 h at room temperature. After removal of the solvent the residue was crystallised form toluene-heptane (1:2) mixture (for **5**) or acetonitrile (for **6**). **5**.C6H5CH3: Yield: 0.470 g (65 %); mp 198-201oC (decomp) [Found: C, 63.21; H, 7.09; N, 4.35. Calc. for C33H45N2O8P (after powdering and drying *in vacuo*): C, 63.04; H, 7.21; N, 4.45]. IR (KBr): = 1736, 1670 cm-1. 1H NMR (CDCl3):  1.36, 1.43 (two s, 18 H, *t*Bu*H*), 2.27, 2.29 (two s, total 9 H, ArC*H*3 + NC*H*3), 2.37 (s, ~ 3 H, Ph-C*H*3), 2.83-3.32 (m, 2 H, NC*H*A*H*X), 3.57 and 5.00 ( two AX doublets, 2*J*(H,H) = 15.6 Hz, 2 H, ArC*H*A*H*X), 3.67 and 3.73 (two s, 3+3 H, OC*H*3), 3.89 and 4.37 (dd and d respectively, 3*J*(H,H) = 11.2 Hz, 4*J*(P,H) ~ 5.3 Hz, 1+1 H, C*H*CO2Me), 4.00-4.30 and 4.80-5.10 (m each, 2 H, P-OC*H*A*H*X), 6.97-7.25 (m, 4+5 H, Ar-*H* + tolyl-*H*). 31P NMR (CDCl3):  - 13.0. **6**.CH3CN: Yield: 0.530 g (76 %); mp 190-192oC [Found: C, 58.91; H, 6.12; N, 2.05. Calc. for C52H66N6O8P2 (after powdering and drying *in vacuo*): C, 58.80; H, 6.09; N, 2.14]. IR (KBr): = 1732 (br) cm-1. 1H NMR (CDCl3):  1.33, 1.35 (two s, 18 H, *t*Bu*H*), 2.00 (s, ~ 3 H, C*H*3CN), 2.32 (br s, 6 H, ArC*H*3), 2.95 and 4.55 (two m, 2 H, OC*H*2CF3), 3.30-3.60, 4.10-4.20, 5.40 and 6.10 (br signals, 3 H, N*H* + ArC*H*A*H*X), 7.00-7.15 (m, 4 H, Ar-*H*). 31P NMR (CDCl3):  - 65.1, - 72.5 (1:2 ratio). The spectra are indicative of a pseudorotational process.5(c)

**S4**

**Fig. 3.** Molecular structure of **4**. Only nonhydrogen atoms are shown with labeling on only selected atoms. Selected bond parameters: P-O(1) 1.542(2), P-O(2) 1.549(2), P-N 1.558(2), P-C(24) 1.773(2), N-C(26) 1.359(3), C(24)-C(25) 1.321(4), C(25)-C(26) 1.521(4) Å.

**S5**

**Fig. 4**. Molecular structure of **6**.CH3CN. The solvent, second diordered oxygen (O4B) and hydrogen atoms are omitted; only selected atoms are labeled. Selected bond parameters: P-O(1) 1.602(2), P-O(2) 1.597(2), P-O(8) 1.652(2), P-N(1) 1.675(3), P-C(28) 1.889(3), N(1)-C(24) 1.378(4), C(24)-C(25) 1.468(5), C(25)-C(28) 1.328(4) Å. O(8)-P-C(28) 176.59(11)o. The N-H hydrogen is hydrogen bonded to the nitrogen of the solvent acetonitrile. N(1)-H....NCCH3 0.66(4), 2.47(4), 3.085 (5) Å, 156(5)o.

**S6**

A possible mechanism for the formation of the heterocycle **4** from the isocyanate **1** is shown in Scheme 2 [step (a)]. A similar but more complicated process is probably taking place in the formation of **3** from the azide **1**; since **1** is stable in solution (even in the presence of sulfur, maleic anhydride or phenyl isocyanate) at room temperature, we believe that the reaction between **1** and the acetylene is the first step in the formation of **3**. In the reaction of **4** with 2-(methylamino)ethanol, a Michael-type [1,4] addition in which the amine attacks at the carbon adjacent to phosphorus is the key step; cleavage of the P-C bond occurs during subsequent attack by the hydroxy group on phosphorus [Scheme 2; steps (b) and (c)].
